# Supplementary material for: Structural fluctuation governed dynamic diradical character in pentacene
Source: Royal Society of Chemistry journal article supplement (doi:10.1039/c5cp00902b), 2015-01-01
Supplement: c5cp00902b1.pdf [file c5cp00902b1.pdf]

## **Structural Fluctuation Governed Dynamic Diradical Character in Pentacene**

Hongfang Yang, Mengzhen Chen, Xinyu Song\*, Yuxiang Bu

*School of Chemistry and Chemical Engineering, Shandong University, Jinan, 250100,*

*People's Republic of China*

**The Corresponding Authors:** songxy@sdu.edu.cn

### **Electronic Supplementary Materials**

#### **Contents**

1. The Complete Citation for Ref. 36
2. Details of Simulations and Calculations
3. Relevant Data for Describing Diradical Character
4. Variations of Molecular Lengths in Time Evolution
5. Variations of the Cross-Linking C-C Bonds in Time Evolution
6. Molecular Bending Effect
7. Hydrogen Swing Effect
8. Singly Occupied Molecular Orbitals and Spin Density Distributions of Some Snapshot Configurations with Diradical Character Extracted from the AIMD Simulation Trajectory
9. Vibration-Caused Distorted Configurations and Their Diradical Character

## 1. The Complete Citation for Ref. 36

Frisch, M. J.; Trucks, G. W.; Schlegel, H. B.; Scuseria, G. E.; Robb, M. A.; Cheeseman, J. R.; Montgomery, J. A., Jr.; Vreven, T.; Kudin, K. N.; Burant, J. C.; Millam, J. M.; Iyengar, S. S.; Tomasi, J.; Barone, V.; Mennucci, B.; Cossi, M.; Scalmani, G.; Rega, N.; Petersson, G. A.; Nakatsuji, H.; Hada, M.; Ehara, M.; Toyota, M.; Fukuda, R.; Hasegawa, J.; Ishida, M.; Nakajima, T.; Honda, Y.; Kitao, O.; Nakai, H.; Klene, M.; Li, X.; Knox, J. E.; Hratchian, H. P.; Cross, J. B.; Adamo, C.; Jaramillo, J.; Gomperts, R.; Stratmann, R. E.; Yazyev, O.; Austin, A. J.; Cammi, R.; Pomelli, C.; Ochterski, J. W.; Ayala, P. Y.; Morokuma, K.; Voth, G. A.; Salvador, P.; Dannenberg, J. J.; Zakrzewski, V. G.; Dapprich, S.; Daniels, A. D.; Strain, M. C.; Farkas, O.; Malick, D. K.; Rabuck, A. D.; Raghavachari, K.; Foresman, J. B.; Ortiz, J. V.; Cui, Q.; Baboul, A. G.; Clifford, S.; Cioslowski, J.; Stefanov, B. B.; Liu, G.; Liashenko, A.; Piskorz, P.; Komaromi, I.; Martin, R. L.; Fox, D. J.; Keith, T.; Al-Laham, M. A.; Peng, C. Y.; Nanayakkara, A.; Challacombe, M.; Gill, P. M. W.; Johnson, B.; Chen, W.; Wong, M. W.; Gonzalez, C.; Pople, J. A. *Gaussian 03*; Gaussian, Inc.: Wallingford, CT, **2004**.

## 2. Computational Details

In order to explore potential diradical character and relevant dynamic properties of pentacene, we performed an *ab initio* molecular dynamics (AIMD) simulation for one pentacene molecule. In our AIMD simulation, we used the DMol<sup>3</sup> package which is based on the density-functional theory (DFT). Before AIMD simulation, a pentacene molecule was firstly optimized to obtain its initial configuration (static structure) using a double numeric plus polarization basis (DNP) set and the generalized gradient approximation (GGA) proposed by Perdew-Burke-Ernzerhof (PBE) for the exchange and correlation function. During the geometry optimization, all electrons are included in the spin-unrestricted calculation. The same conditions were maintained in the AIMD simulation. Besides, total AIMD simulation time is 2 ps, which was performed within the canonical (NVT) ensemble with the system temperature around 300 K by using the Nose-Hoover chain of thermostats. The simulation

was done using DMol<sup>3</sup> package and all parameters and details are the same with the geometry optimization.

For all snapshot configurations extracted from the 2 ps trajectory, DFT calculations were performed using Gaussian 03 package. As we are interested in potential diradical character of the thermodynamic ensemble of pentacene and not of the minimum structure, the molecular coordinates were directly taken from the 2 ps AIMD trajectory without further DFT optimizations. Initially, we took configurations from the trajectory every 10 fs, and obtained their closed-shell singlet (CS), open-shell broken-symmetry singlet (BS), triplet (T) states through single-point calculations at the (U)B3LYP/6-31G(d,p) level of theory. To confirm the results of the B3LYP method, the CASSCF (10, 10) calculations were also performed to determine the orbital occupation numbers for the snapshot configurations possessing diradical character. All CASSCF calculations were performed at a 6-31G(d) basis set level. By doing so, we got the ground state of each snapshot configuration (not the global minimum at potential energy surface of pentacene molecule) and the energetic criteria of diradical character appearing. In addition, we chose some typical short trajectories (two arbitrary time regions in the 2 ps trajectory) for more detailed analyses. To do this, we did conformational sampling every 1 fs in order to explore the inherent factors which dominate the appearance of diradical character of pentacene.

To clarify possible association of the snapshot configurations with diradical character with molecular vibrational modes, we optimized pentacene molecule at the B3LYP/6-31G(d,p) level with frequency analysis and further examined diradical character of its 102 distorted configurations according to the 102 vibrational modes. Each distorted configuration is generated by adding the shift vector coordinates (x, y, z) of each atom in a vibrational mode to the corresponding coordinates of that atom in standard orientation. For each vibrational mode-distorted configuration, the energies of three states (closed-shell singlet state (CS), open-shell broken-symmetry singlet state (OS or BS), and triplet state (T)) are calculated, together with other parameters such as HOMO and LUMO energies and their gaps, singlet-triplet state energy gaps, spin contamination  $\langle S^2 \rangle$ , vibrational frequencies and periods, and HOMO, LUMO, or SOMO, spin densities, and so on are given below (Table S12).

### 3. Relevant Data for Describing Diradical Character

**Table S1.** The numbers of electrons outside closed-shell bonding orbitals (BO), occupation numbers of HOMO and LUMO, and diradical percentages for configurations with diradical character calculated using the CASSCF(10,10)/6-31G(d) method.

**Note** that configuration at 0 fs corresponds to the static pentacene.

| Simulation Time (fs) | Total occupancy outside BO | Occupation number of HOMO | Occupation number of LUMO | Diradical percentage (%) |
|----------------------|----------------------------|---------------------------|---------------------------|--------------------------|
| 0                    | 0.343                      | 1.882                     | 0.121                     | 12.1                     |
| 50                   | 0.488                      | 1.853                     | 0.152                     | 15.2                     |
| 120                  | 0.465                      | 1.861                     | 0.144                     | 14.4                     |
| 140                  | 0.510                      | 1.837                     | 0.167                     | 16.7                     |
| 160                  | 0.538                      | 1.778                     | 0.225                     | 22.5                     |
| 210                  | 0.495                      | 1.846                     | 0.158                     | 15.8                     |
| 280                  | 0.440                      | 1.850                     | 0.153                     | 15.3                     |
| 300                  | 0.516                      | 1.785                     | 0.218                     | 21.8                     |
| 390                  | 0.599                      | 1.716                     | 0.287                     | 28.7                     |
| 410                  | 0.486                      | 1.848                     | 0.156                     | 15.6                     |
| 430                  | 0.493                      | 1.838                     | 0.167                     | 16.7                     |
| 500                  | 0.527                      | 1.794                     | 0.208                     | 20.8                     |
| 610                  | 0.484                      | 1.856                     | 0.149                     | 14.9                     |
| 650                  | 0.502                      | 1.813                     | 0.190                     | 19.0                     |
| 700                  | 0.473                      | 1.855                     | 0.149                     | 14.9                     |
| 720                  | 0.460                      | 1.840                     | 0.164                     | 16.4                     |
| 740                  | 0.452                      | 1.848                     | 0.155                     | 15.5                     |
| 760                  | 0.430                      | 1.863                     | 0.141                     | 14.1                     |
| 810                  | 0.480                      | 1.858                     | 0.147                     | 14.7                     |
| 830                  | 0.527                      | 1.780                     | 0.222                     | 22.2                     |
| 900                  | 0.525                      | 1.793                     | 0.210                     | 21.0                     |
| 920                  | 0.489                      | 1.849                     | 0.156                     | 15.6                     |
| 990                  | 0.473                      | 1.814                     | 0.189                     | 18.9                     |
| 1010                 | 0.458                      | 1.865                     | 0.140                     | 14.0                     |
| 1160                 | 0.472                      | 1.860                     | 0.145                     | 14.5                     |
| 1520                 | 0.483                      | 1.812                     | 0.191                     | 19.1                     |
| 1580                 | 0.472                      | 1.854                     | 0.151                     | 15.1                     |
| 1780                 | 0.526                      | 1.791                     | 0.211                     | 21.1                     |
| 1800                 | 0.500                      | 1.806                     | 0.197                     | 19.7                     |
| 1890                 | 0.488                      | 1.856                     | 0.150                     | 15.0                     |
| 1960                 | 0.492                      | 1.790                     | 0.213                     | 21.3                     |

**Table S2.** Spin contaminations for the open-shell BS singlet ( $\langle S^2 \rangle$ ) and energy orders of 200 snapshot configurations extracted from a 2 ps trajectory one every 10 fs, calculated at the UB3LYP/6-31G(d,p) level (the original data for Figure 1 in the text)

| Simulation Times (fs) | $\langle S^2 \rangle$ | Energy Orders                   | Simulation Times (fs) | $\langle S^2 \rangle$ | Energy Orders                   |
|-----------------------|-----------------------|---------------------------------|-----------------------|-----------------------|---------------------------------|
| 0-40                  | 0                     | $E_{(CS)} < E_{(T)}$            | 750                   | 0                     | $E_{(CS)} < E_{(T)}$            |
| 50                    | 0.10                  | $E_{(BS)} < E_{(CS)} < E_{(T)}$ | 760                   | 0.04                  | $E_{(BS)} < E_{(CS)} < E_{(T)}$ |
| 60-110                | 0                     | $E_{(CS)} < E_{(T)}$            | 770-800               | 0                     | $E_{(CS)} < E_{(T)}$            |
| 120                   | 0.09                  | $E_{(BS)} < E_{(CS)} < E_{(T)}$ | 810                   | 0.09                  | $E_{(BS)} < E_{(CS)} < E_{(T)}$ |
| 130                   | 0                     | $E_{(CS)} < E_{(T)}$            | 820                   | 0                     | $E_{(CS)} < E_{(T)}$            |
| 140                   | 0.35                  | $E_{(BS)} < E_{(CS)} < E_{(T)}$ | 830                   | 0.02                  | $E_{(BS)} < E_{(CS)} < E_{(T)}$ |
| 150                   | 0                     | $E_{(CS)} < E_{(T)}$            | 840-890               | 0                     | $E_{(CS)} < E_{(T)}$            |
| 160                   | 0.10                  | $E_{(BS)} < E_{(CS)} < E_{(T)}$ | 900                   | 0.2                   | $E_{(BS)} < E_{(CS)} < E_{(T)}$ |
| 170-200               | 0                     | $E_{(CS)} < E_{(T)}$            | 910                   | 0                     | $E_{(CS)} < E_{(T)}$            |
| 210                   | 0.28                  | $E_{(BS)} < E_{(CS)} < E_{(T)}$ | 920                   | 0.14                  | $E_{(BS)} < E_{(CS)} < E_{(T)}$ |
| 220-270               | 0                     | $E_{(CS)} < E_{(T)}$            | 930-980               | 0                     | $E_{(CS)} < E_{(T)}$            |
| 280                   | 0.10                  | $E_{(BS)} < E_{(CS)} < E_{(T)}$ | 990                   | 0.01                  | $E_{(BS)} < E_{(CS)} < E_{(T)}$ |
| 290                   | 0                     | $E_{(CS)} < E_{(T)}$            | 1000                  | 0                     | $E_{(CS)} < E_{(T)}$            |
| 300                   | 0.07                  | $E_{(BS)} < E_{(CS)} < E_{(T)}$ | 1010                  | 0.02                  | $E_{(BS)} < E_{(CS)} < E_{(T)}$ |
| 310-380               | 0                     | $E_{(CS)} < E_{(T)}$            | 1020-1150             | 0                     | $E_{(CS)} < E_{(T)}$            |
| 390                   | 0.08                  | $E_{(BS)} < E_{(CS)} < E_{(T)}$ | 1160                  | 0.11                  | $E_{(BS)} < E_{(CS)} < E_{(T)}$ |
| 400                   | 0                     | $E_{(CS)} < E_{(T)}$            | 1170-1510             | 0                     | $E_{(CS)} < E_{(T)}$            |
| 410                   | 0.07                  | $E_{(BS)} < E_{(CS)} < E_{(T)}$ | 1520                  | 0.09                  | $E_{(BS)} < E_{(CS)} < E_{(T)}$ |
| 420                   | 0                     | $E_{(CS)} < E_{(T)}$            | 1530-1570             | 0                     | $E_{(CS)} < E_{(T)}$            |
| 430                   | 0.18                  | $E_{(BS)} < E_{(CS)} < E_{(T)}$ | 1580                  | 0.13                  | $E_{(BS)} < E_{(CS)} < E_{(T)}$ |
| 440-490               | 0                     | $E_{(CS)} < E_{(T)}$            | 1590-1770             | 0                     | $E_{(CS)} < E_{(T)}$            |
| 500                   | 0.04                  | $E_{(BS)} < E_{(CS)} < E_{(T)}$ | 1780                  | 0.21                  | $E_{(BS)} < E_{(CS)} < E_{(T)}$ |
| 510-600               | 0                     | $E_{(CS)} < E_{(T)}$            | 1790                  | 0                     | $E_{(CS)} < E_{(T)}$            |
| 610                   | 0.12                  | $E_{(BS)} < E_{(CS)} < E_{(T)}$ | 1800                  | 0.08                  | $E_{(BS)} < E_{(CS)} < E_{(T)}$ |
| 620-640               | 0                     | $E_{(CS)} < E_{(T)}$            | 1810-1880             | 0                     | $E_{(CS)} < E_{(T)}$            |
| 650                   | 0.23                  | $E_{(BS)} < E_{(CS)} < E_{(T)}$ | 1890                  | 0.13                  | $E_{(BS)} < E_{(CS)} < E_{(T)}$ |
| 660-690               | 0                     | $E_{(CS)} < E_{(T)}$            | 1900-1950             | 0                     | $E_{(CS)} < E_{(T)}$            |
| 700                   | 0.18                  | $E_{(BS)} < E_{(CS)} < E_{(T)}$ | 1960                  | 0.09                  | $E_{(BS)} < E_{(CS)} < E_{(T)}$ |
| 710                   | 0                     | $E_{(CS)} < E_{(T)}$            | 1970-2000             | 0                     | $E_{(CS)} < E_{(T)}$            |
| 720                   | 0.14                  | $E_{(BS)} < E_{(CS)} < E_{(T)}$ |                       |                       |                                 |
| 730                   | 0                     | $E_{(CS)} < E_{(T)}$            |                       |                       |                                 |
| 740                   | 0.10                  | $E_{(BS)} < E_{(CS)} < E_{(T)}$ |                       |                       |                                 |

**Table S3.** Spin contaminations for the open-shell BS singlet ( $\langle S^2 \rangle$ ) of snapshot configurations extracted one every 1 fs from two time ranges (640-840 fs and 1700-1900 fs) in a 2 ps trajectory, calculated at the UB3LYP/6-31G(d,p) level (the original data for Figure 6)

| Simulation Times (fs) | $\langle S^2 \rangle$ | Simulation Times (fs) | $\langle S^2 \rangle$ | Simulation Times (fs) | $\langle S^2 \rangle$ |
|-----------------------|-----------------------|-----------------------|-----------------------|-----------------------|-----------------------|
| 640-647               | 0.0                   | 743                   | 0.201                 | 1700-1715             | 0.0                   |
| 648                   | 0.051                 | 744                   | 0.154                 | 1716                  | 0.002                 |
| 649                   | 0.157                 | 745                   | 0.079                 | 1717-1775             | 0.0                   |
| 650                   | 0.230                 | 746-759               | 0.0                   | 1776                  | 0.028                 |
| 651                   | 0.285                 | 760                   | 0.037                 | 1777                  | 0.107                 |
| 652                   | 0.312                 | 761                   | 0.141                 | 1778                  | 0.157                 |
| 653                   | 0.316                 | 762                   | 0.200                 | 1779                  | 0.189                 |
| 654                   | 0.294                 | 763                   | 0.243                 | 1780                  | 0.207                 |
| 655                   | 0.245                 | 764                   | 0.266                 | 1781                  | 0.203                 |
| 656                   | 0.170                 | 765                   | 0.257                 | 1782                  | 0.184                 |
| 657                   | 0.060                 | 766                   | 0.219                 | 1783                  | 0.148                 |
| 658-672               | 0.0                   | 767                   | 0.151                 | 1784                  | 0.074                 |
| 673                   | 0.098                 | 768                   | 0.037                 | 1785-1798             | 0.0                   |
| 674                   | 0.154                 | 769-781               | 0.0                   | 1799                  | 0.041                 |
| 675                   | 0.181                 | 782                   | 0.019                 | 1800                  | 0.081                 |
| 676                   | 0.168                 | 783                   | 0.09952               | 1801                  | 0.112                 |
| 677                   | 0.131                 | 784                   | 0.161                 | 1802                  | 0.109                 |
| 678                   | 0.068                 | 785                   | 0.210                 | 1803                  | 0.107                 |
| 679-695               | 0.0                   | 786                   | 0.219                 | 1804                  | 0.083                 |
| 696                   | 0.105                 | 787                   | 0.205                 | 1805                  | 0.031                 |
| 697                   | 0.187                 | 788                   | 0.166                 | 1806-1823             | 0.0                   |
| 698                   | 0.227                 | 789                   | 0.087                 | 1824                  | 0.004                 |
| 699                   | 0.224                 | 790-805               | 0.0                   | 1825                  | 0.066                 |
| 700                   | 0.179                 | 806                   | 0.022                 | 1826                  | 0.099                 |
| 701                   | 0.092                 | 807                   | 0.093                 | 1827                  | 0.109                 |
| 702-718               | 0.0                   | 808                   | 0.118                 | 1828                  | 0.087                 |
| 719                   | 0.065                 | 809                   | 0.119                 | 1829                  | 0.042                 |
| 720                   | 0.140                 | 810                   | 0.095                 | 1830-1888             | 0.0                   |
| 721                   | 0.172                 | 811                   | 0.028                 | 1889                  | 0.064                 |
| 722                   | 0.160                 | 812-829               | 0.0                   | 1890                  | 0.128                 |
| 723                   | 0.113                 | 830                   | 0.016                 | 1891                  | 0.162                 |
| 724                   | 0.034                 | 831                   | 0.047                 | 1892                  | 0.172                 |
| 725-739               | 0.0                   | 832                   | 0.044                 | 1893                  | 0.153                 |
| 740                   | 0.104                 | 833                   | 0.016                 | 1894                  | 0.113                 |
| 741                   | 0.173                 | 834-840               | 0.0                   | 1895                  | 0.056                 |
| 742                   | 0.210                 |                       |                       | 1896-1900             | 0.0                   |

**Table S4.** Calculated energies (in au),  $\langle S^2 \rangle$  values, and intramolecular magnetic exchange coupling constants ( $J$  in  $\text{cm}^{-1}$ ) at the UB3LYP/6-31G(d,p) level for a part of snapshot configurations with diradical character

| Simulation Times (fs) | $E_{(T)}$ ( $\langle S^2 \rangle$ ) | $E_{(BS)}$ ( $\langle S^2 \rangle$ ) | $J$ ( $\text{cm}^{-1}$ ) |
|-----------------------|-------------------------------------|--------------------------------------|--------------------------|
| 50                    | -846.73298754 (2.030)               | -846.76046199 (0.103)                | -3129.3                  |
| 120                   | -846.75739962 (2.029)               | -846.78513529 (0.069)                | -3106.5                  |
| 140                   | -846.73146102 (2.032)               | -846.75396142 (0.353)                | -2940.7                  |
| 160                   | -846.71941541 (2.030)               | -846.74642417 (0.099)                | -3069.8                  |
| 210                   | -846.73603171 (2.032)               | -846.75939775 (0.284)                | -2933.9                  |
| 280                   | -846.72061700 (2.030)               | -846.74750753 (0.104)                | -3063.1                  |
| 300                   | -846.73972245 (2.029)               | -846.76777767 (0.071)                | -3145.4                  |
| 390                   | -846.73832425 (2.032)               | -846.76620531 (0.080)                | -3136.0                  |
| 410                   | -846.73721394 (2.029)               | -846.76513962 (0.070)                | -3129.7                  |
| 430                   | -846.72885487 (2.029)               | -846.75401411 (0.185)                | -2994.7                  |
| 500                   | -846.73501782 (2.030)               | -846.76355127 (0.037)                | -3142.3                  |
| 610                   | -846.75423117 (2.030)               | -846.78098432 (0.119)                | -3071.5                  |
| 650                   | -846.73149004 (2.033)               | -846.75605386 (0.230)                | -2990.1                  |
| 700                   | -846.73853302 (2.031)               | -846.76393470 (0.179)                | -3010.1                  |
| 720                   | -846.74611654 (2.030)               | -846.77237359 (0.140)                | -3049.9                  |
| 740                   | -846.73492725 (2.031)               | -846.76240200 (0.104)                | -3128.7                  |
| 760                   | -846.73949395 (2.029)               | -846.76812018 (0.037)                | -3153.4                  |
| 810                   | -846.75105538 (2.029)               | -846.77841593 (0.095)                | -3104.6                  |
| 830                   | -846.74093878 (2.033)               | -846.76938721 (0.016)                | -3096.2                  |
| 900                   | -846.74799236 (2.030)               | -846.77339585 (0.199)                | -3045.6                  |
| 920                   | -846.75816968 (2.031)               | -846.78436928 (0.142)                | -3043.7                  |
| 990                   | -846.74477200 (2.029)               | -846.77316252 (0.009)                | -3083.9                  |
| 1010                  | -846.73582729 (2.032)               | -846.76458943 (0.019)                | -3137.0                  |
| 1160                  | -846.73329487 (2.031)               | -846.75985990 (0.111)                | -3036.8                  |
| 1520                  | -846.74330420 (2.030)               | -846.77052005 (0.086)                | -3072.9                  |
| 1580                  | -846.72978714 (2.029)               | -846.75593503 (0.129)                | -3021.2                  |
| 1780                  | -846.72442327 (2.036)               | -846.74992843 (0.207)                | -3059.7                  |
| 1800                  | -846.72861481 (2.027)               | -846.75591497 (0.081)                | -3077.7                  |
| 1890                  | -846.73754610 (2.029)               | -846.76398393 (0.128)                | -3051.5                  |
| 1960                  | -846.74311754 (2.032)               | -846.77063084 (0.087)                | -3104.7                  |

**Note:** We use a simple broken-symmetry (BS) formalism which was developed by Yamaguchi *et al.* (Yamaguchi, K.; Takahara, Y.; Fueno, T.; Nasu, K. *Jpn. J. Appl. Phys.* **1987**, *26*, L1362. Yamaguchi, K.; Jensen, F.; Dorigo, A.; Houk, K. N. *Chem. Phys. Lett.* **1988**, *149*, 537) and regarded as the most appropriate one for estimating magnetic exchange coupling interaction in diradicals to estimate the  $J$  value. The formula is given as  $J = \frac{E_{BS} - E_T}{\langle S^2 \rangle_T - \langle S^2 \rangle_{BS}}$ , where  $E_{BS}$  and  $E_T$  refer to the energies of unrestricted open-shell BS singlet and triplet states, while  $\langle S^2 \rangle_{BS}$  and  $\langle S^2 \rangle_T$  are the corresponding average spin square  $\langle S^2 \rangle$  values, respectively.

#### 4. Variations of Molecular Lengths in Time Evolution

**Table S5.** Molecular lengths (Å) of snapshot configurations extracted from the trajectory one every 1 fs in the time range of 760-833 fs

| Simulation Time (fs) | Molecular lengths (Å) | Simulation Time (fs) | Molecular lengths (Å) | Simulation Time (fs) | Molecular lengths (Å) |
|----------------------|-----------------------|----------------------|-----------------------|----------------------|-----------------------|
| 760                  | 12.23                 | 769                  | 12.25                 | 812                  | 12.13                 |
| 761                  | 12.23                 | 770                  | 12.25                 | 813                  | 12.12                 |
| 762                  | 12.24                 | 771                  | 12.24                 | 814                  | 12.12                 |
| 763                  | 12.24                 | 772                  | 12.24                 | 815                  | 12.11                 |
| 764                  | 12.25                 | 773                  | 12.24                 | 816                  | 12.10                 |
| 765                  | 12.25                 | 774                  | 12.24                 | 817                  | 12.10                 |
| 766                  | 12.25                 | 775                  | 12.23                 | 818                  | 12.09                 |
| 767                  | 12.25                 | 776                  | 12.23                 | 819                  | 12.08                 |
| 768                  | 12.25                 | 777                  | 12.23                 | 820                  | 12.08                 |
| <b>760-768</b>       | <b>12.24</b>          | 778                  | 12.22                 | 821                  | 12.07                 |
| 782                  | 12.21                 | 779                  | 12.22                 | 822                  | 12.07                 |
| 783                  | 12.20                 | 780                  | 12.22                 | 823                  | 12.07                 |
| 784                  | 12.20                 | 781                  | 12.21                 | 824                  | 12.07                 |
| 785                  | 12.19                 | <b>769-781</b>       | <b>12.23</b>          | 825                  | 12.07                 |
| 786                  | 12.19                 | 790                  | 12.16                 | 826                  | 12.07                 |
| 787                  | 12.18                 | 791                  | 12.15                 | 827                  | 12.08                 |
| 788                  | 12.17                 | 792                  | 12.14                 | 828                  | 12.08                 |
| 789                  | 12.16                 | 793                  | 12.14                 | 829                  | 12.08                 |
| <b>782-789</b>       | <b>12.19</b>          | 794                  | 12.13                 | <b>812-829</b>       | <b>12.09</b>          |
| 806                  | 12.16                 | 795                  | 12.13                 |                      |                       |
| 807                  | 12.16                 | 796                  | 12.13                 |                      |                       |
| 808                  | 12.15                 | 797                  | 12.13                 |                      |                       |
| 809                  | 12.15                 | 798                  | 12.13                 |                      |                       |
| 810                  | 12.14                 | 799                  | 12.13                 |                      |                       |
| 811                  | 12.14                 | 800                  | 12.14                 |                      |                       |
| <b>806-811</b>       | <b>12.15</b>          | 801                  | 12.14                 |                      |                       |
| 830                  | 12.08                 | 802                  | 12.14                 |                      |                       |
| 831                  | 12.08                 | 803                  | 12.15                 |                      |                       |
| 832                  | 12.08                 | 804                  | 12.15                 |                      |                       |
| 833                  | 12.08                 | 805                  | 12.15                 |                      |                       |
| <b>830-833</b>       | <b>12.08</b>          | <b>790-805</b>       | <b>12.14</b>          |                      |                       |



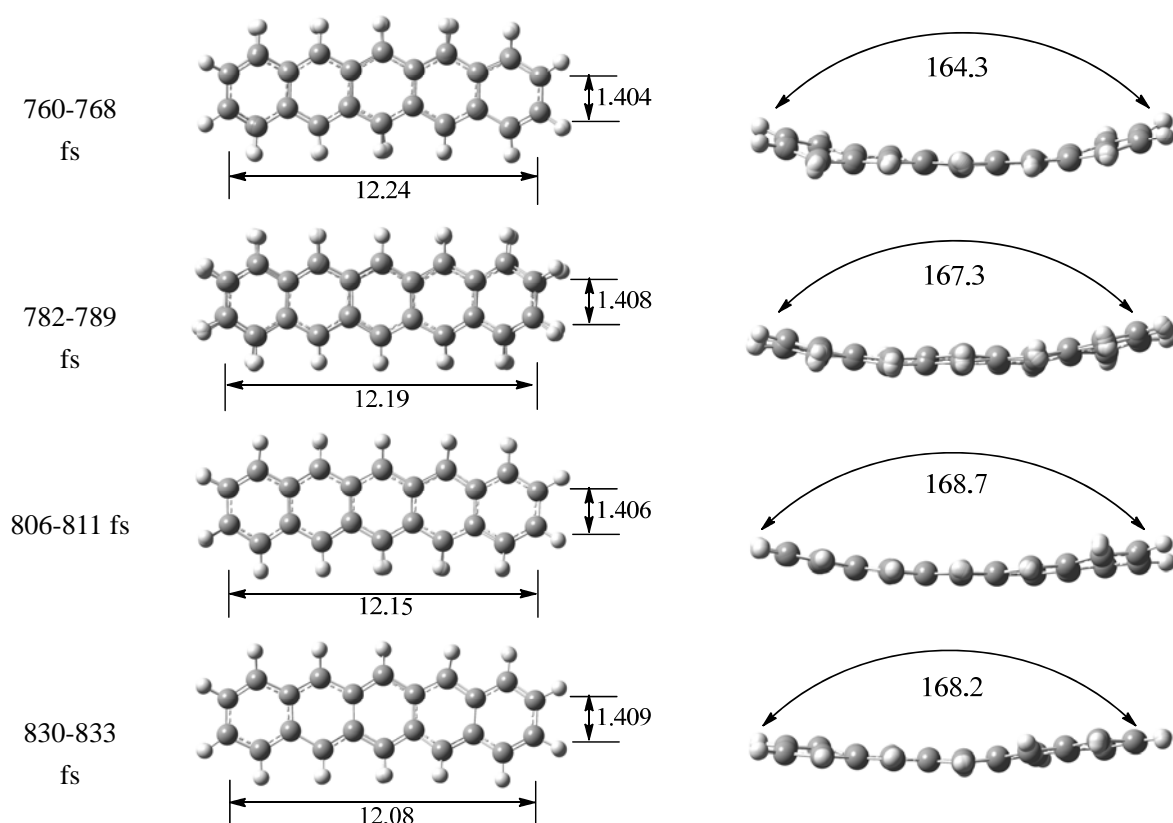

**Figure S1.** Geometry evolution in four typical time ranges in the trajectory and main geometrical parameters: molecular lengths measured by the marked C...C distance, C-C bond lengths of the most outer ones, and bending angles.

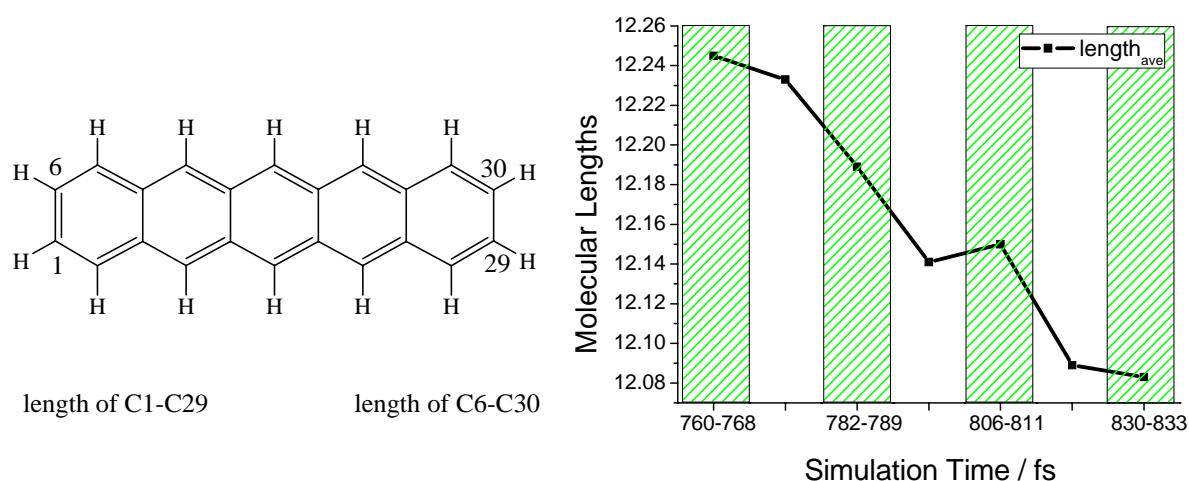

**Figure S2.** Average molecular lengths ( $\text{\AA}$ ) in different time ranges along with the simulation time according to data in Table S5 and Figure S1. The sparse green-line filled areas denote the time ranges in which the diradical character appears. This figure shows no correlation between the diradical character and the average molecular length.

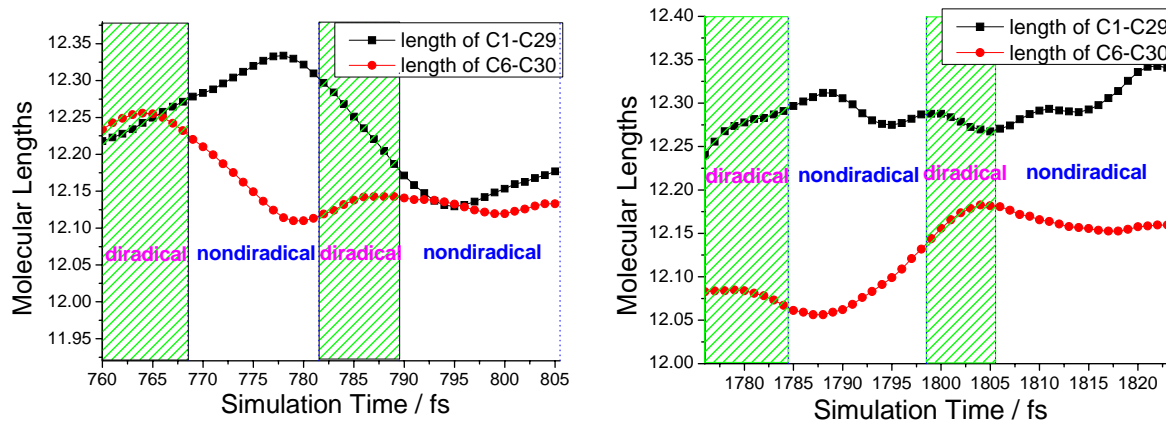

**Figure S3.** Molecular length evolution (Å) of instantaneous configurations extracted every 1 fs from 760 fs to 805 fs (**Left**) and from 1776 fs to 1823 fs (**Right**), respectively. The sparse green-line filled areas denote the time ranges in which the diradical character appears. There is no correlation between the diradical character and molecular length.

## 5. Variations of the Cross-Linking C-C Bonds in Time Evolution

We monitor the changes of six cross-linking C-C bonds (that is, C1-C6, C3-C4, C9-C8, C12-C13, C16-C17, and C29-C30) along the evolution time, and those for the average, longest, and shortest C-C bonds are given in Table S6. The changes of them and all six C-C bonds in two time ranges (760-805 fs, 1776-1823 fs) are displayed in Figure S4.

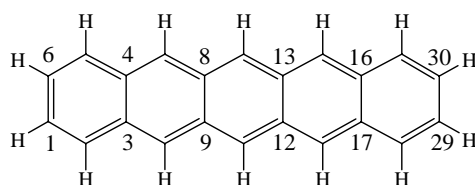

**Table S6.** Cross-linking C-C bonds (Å) of snapshot configurations extracted from the trajectory one every 1 fs in the time range of 760-833 fs. Note that C-C<sub>ave</sub> are the average values of six cross-linking C-C bonds of each configuration, while C-C<sub>shortest</sub> and C-C<sub>longest</sub> are the average values of the shortest and the longest C-C bonds, respectively. Besides, values in bold of the 2<sup>nd</sup>, 3<sup>rd</sup>, 4<sup>th</sup>, 6<sup>th</sup>, 7<sup>th</sup> and 8<sup>th</sup> columns are all average ones of the corresponding time ranges (1<sup>st</sup> and 5<sup>th</sup> columns).

| Simulation Times (fs) | C-C <sub>ave</sub> (Å) | C-C <sub>shortest</sub> (Å) | C-C <sub>longest</sub> (Å) | Simulation Times (fs) | C-C <sub>ave</sub> (Å) | C-C <sub>shortest</sub> (Å) | C-C <sub>longest</sub> (Å) |
|-----------------------|------------------------|-----------------------------|----------------------------|-----------------------|------------------------|-----------------------------|----------------------------|
| 760                   | 1.432                  | 1.395                       | 1.475                      | 769                   | 1.449                  | 1.428                       | 1.497                      |
| 761                   | 1.426                  | 1.394                       | 1.467                      | 770                   | 1.457                  | 1.431                       | 1.508                      |
| 762                   | 1.423                  | 1.395                       | 1.460                      | 771                   | 1.464                  | 1.435                       | 1.516                      |
| 763                   | 1.421                  | 1.399                       | 1.451                      | 772                   | 1.471                  | 1.441                       | 1.522                      |
| 764                   | 1.421                  | 1.405                       | 1.443                      | 773                   | 1.478                  | 1.446                       | 1.524                      |
| 765                   | 1.423                  | 1.407                       | 1.436                      | 774                   | 1.482                  | 1.451                       | 1.523                      |
| 766                   | 1.428                  | 1.408                       | 1.449                      | 775                   | 1.485                  | 1.446                       | 1.519                      |
| 767                   | 1.433                  | 1.411                       | 1.466                      | 776                   | 1.486                  | 1.452                       | 1.528                      |
| 768                   | 1.441                  | 1.421                       | 1.481                      | 777                   | 1.485                  | 1.447                       | 1.536                      |
| <b>760-768</b>        | <b>1.428</b>           | <b>1.404</b>                | <b>1.459</b>               | 778                   | 1.482                  | 1.441                       | 1.540                      |
| 782                   | 1.457                  | 1.413                       | 1.517                      | 779                   | 1.477                  | 1.435                       | 1.539                      |
| 783                   | 1.451                  | 1.410                       | 1.506                      | 780                   | 1.471                  | 1.428                       | 1.535                      |
| 784                   | 1.445                  | 1.407                       | 1.493                      | 781                   | 1.464                  | 1.421                       | 1.527                      |
| 785                   | 1.439                  | 1.405                       | 1.476                      | <b>769-781</b>        | <b>1.473</b>           | <b>1.439</b>                | <b>1.524</b>               |
| 786                   | 1.436                  | 1.405                       | 1.462                      | 790                   | 1.437                  | 1.408                       | 1.473                      |
| 787                   | 1.434                  | 1.406                       | 1.450                      | 791                   | 1.439                  | 1.407                       | 1.484                      |
| 788                   | 1.433                  | 1.409                       | 1.448                      | 792                   | 1.443                  | 1.409                       | 1.495                      |
| 789                   | 1.434                  | 1.410                       | 1.460                      | 793                   | 1.448                  | 1.410                       | 1.504                      |
| <b>782-789</b>        | <b>1.441</b>           | <b>1.408</b>                | <b>1.477</b>               | 794                   | 1.454                  | 1.413                       | 1.511                      |
| 806                   | 1.437                  | 1.401                       | 1.460                      | 795                   | 1.458                  | 1.416                       | 1.515                      |
| 807                   | 1.433                  | 1.397                       | 1.452                      | 796                   | 1.462                  | 1.419                       | 1.514                      |
| 808                   | 1.432                  | 1.398                       | 1.446                      | 797                   | 1.464                  | 1.421                       | 1.510                      |
| 809                   | 1.431                  | 1.403                       | 1.445                      | 798                   | 1.466                  | 1.423                       | 1.503                      |
| 810                   | 1.432                  | 1.412                       | 1.447                      | 799                   | 1.466                  | 1.425                       | 1.500                      |
| 811                   | 1.435                  | 1.423                       | 1.452                      | 800                   | 1.463                  | 1.425                       | 1.499                      |
| <b>806-811</b>        | <b>1.433</b>           | <b>1.406</b>                | <b>1.450</b>               | 801                   | 1.460                  | 1.425                       | 1.496                      |
| 830                   | 1.437                  | 1.400                       | 1.479                      | 802                   | 1.456                  | 1.427                       | 1.491                      |
| 831                   | 1.435                  | 1.405                       | 1.468                      | 803                   | 1.451                  | 1.428                       | 1.484                      |
| 832                   | 1.435                  | 1.411                       | 1.458                      | 804                   | 1.446                  | 1.421                       | 1.477                      |
| 833                   | 1.436                  | 1.418                       | 1.452                      | 805                   | 1.441                  | 1.409                       | 1.468                      |
| <b>830-833</b>        | <b>1.436</b>           | <b>1.409</b>                | <b>1.464</b>               | <b>790-805</b>        | <b>1.453</b>           | <b>1.418</b>                | <b>1.495</b>               |
|                       |                        |                             |                            | 812                   | 1.438                  | 1.425                       | 1.456                      |
|                       |                        |                             |                            | 813                   | 1.443                  | 1.428                       | 1.461                      |

|  |                |              |              |              |
|--|----------------|--------------|--------------|--------------|
|  | 814            | 1.448        | 1.434        | 1.470        |
|  | 815            | 1.453        | 1.436        | 1.482        |
|  | 816            | 1.458        | 1.437        | 1.492        |
|  | 817            | 1.463        | 1.437        | 1.503        |
|  | 818            | 1.467        | 1.436        | 1.512        |
|  | 819            | 1.470        | 1.435        | 1.516        |
|  | 820            | 1.471        | 1.431        | 1.519        |
|  | 821            | 1.471        | 1.426        | 1.518        |
|  | 822            | 1.468        | 1.418        | 1.520        |
|  | 823            | 1.466        | 1.411        | 1.524        |
|  | 824            | 1.462        | 1.407        | 1.526        |
|  | 825            | 1.457        | 1.403        | 1.524        |
|  | 826            | 1.452        | 1.399        | 1.519        |
|  | 827            | 1.447        | 1.397        | 1.512        |
|  | 828            | 1.443        | 1.397        | 1.504        |
|  | 829            | 1.440        | 1.398        | 1.494        |
|  | <b>812-829</b> | <b>1.457</b> | <b>1.420</b> | <b>1.503</b> |

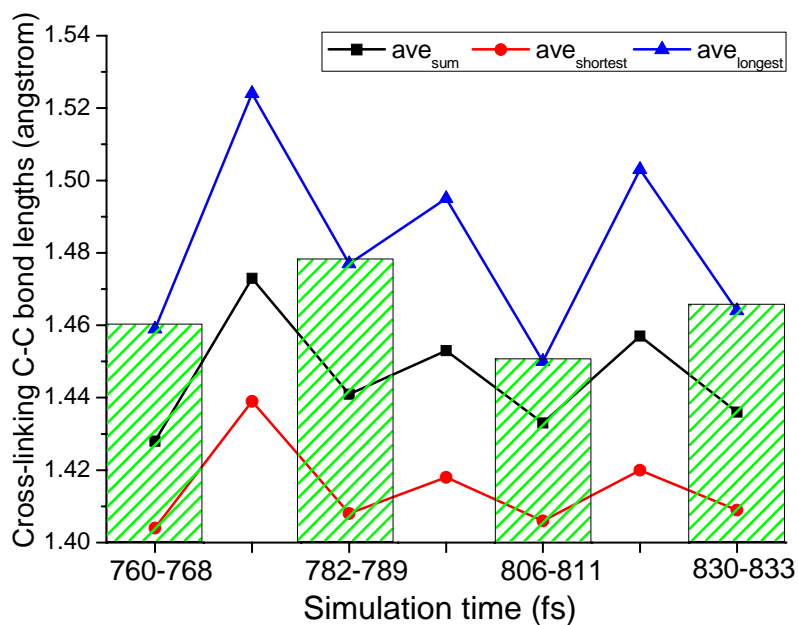

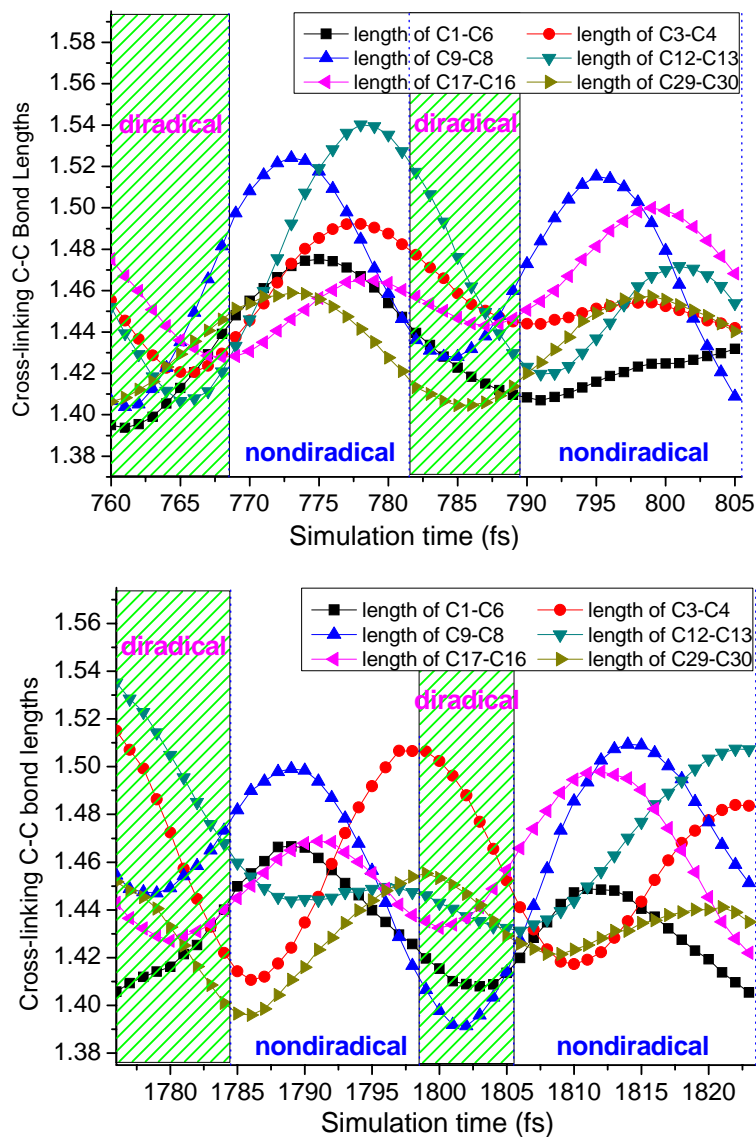

**Figure S4.** (*The first*) Average cross-linking C-C bond lengths (Table S6, Å) in different time ranges of the simulation trajectory, where  $\text{ave}_{\text{sum}}$ ,  $\text{ave}_{\text{shortest}}$  and  $\text{ave}_{\text{longest}}$  denote the average ones over all six, the shortest, and the longest cross-linking C-C bonds, respectively. The sparse green-line filled areas denote the time ranges in which the diradical character appears. The right is the pentacene structure with the corresponding atomic numbering. Time evolution of the cross-linking C-C bond lengths (Å) of instantaneous configurations extracted every 1 fs in 760-805 fs (*the second*) and in 1776-1823 fs (*the third*) from the simulation trajectory, respectively. The sparse green-line filled areas denote the time ranges in which the diradical character appears.

## 6. Molecular Bending Effect

To check if there is a relationship between molecular bending and diradical character appearing for pentacene in time evolution, we measure the molecular bending angle according to the following definition (chart). That is, the bending angle is defined by  $\angle 123$  marked in the chart. Relevant bending angles along the time are given in Table S7 and also displayed in Figure S5 and S6. Together with the calculated possible diradical character, these data do not present any relationship with the diradical character of snapshot configurations of pentacene. In other words, the molecular bending is not a driving factor for diradical character appearing for some snapshot configurations of pentacene.

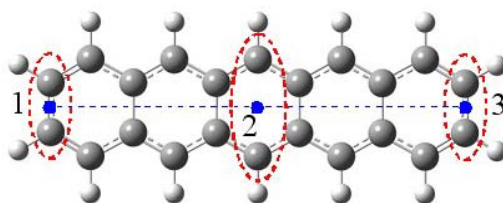

To further clarify this issue, we also calculate the electronic properties of bent pentacene model extracted from the corresponding single-wall carbon nanotube (SWCNT). Each extracted configuration is saturated by hydrogen atoms for the cutting bonds, forming the corresponding bent model pentacene configuration with a bending angle ( $\angle 123$ ). Then, two cases are considered: **i**) the configuration is directly calculated for examining its diradical character; **ii**) by fixing its C1-C29 and C6-C30 distances the configuration is further optimized partially and then calculated for examining its diradical character. Results indicate that for the case **i**) all model configurations extracted directly from SWCNTs exhibit diradical character, as shown in Table S8, but for the case **ii**) the diradical character for all configurations disappears, as shown in Table S9. Comparison between these two cases indicates that a bent pentacene (relaxed) does not have diradical character unless its backbone is tensioned (unrelaxed).

Thus, we can conclude that just a bending does not trigger pentacene a diradical character, and thus observed diradical character of pentacene in time evolution must be attributed to other factors (e.g. other geometrical distortions).

**Table S7.** Bending Angles (°) of Snapshot Configurations Extracted from the Trajectory One Every 1 fs in the Time Range of 760-833 fs

| Simulation Time (fs) | Bending angles (°) | Simulation Time (fs) | Bending angles (°) | Simulation Time (fs) | Bending angles (°) |
|----------------------|--------------------|----------------------|--------------------|----------------------|--------------------|
| 760                  | 164.1              | 769                  | 164.8              | 812                  | 168.8              |
| 761                  | 164.1              | 770                  | 164.9              | 813                  | 168.8              |
| 762                  | 164.2              | 771                  | 165.1              | 814                  | 168.8              |
| 763                  | 164.2              | 772                  | 165.2              | 815                  | 168.8              |
| 764                  | 164.3              | 773                  | 165.3              | 816                  | 168.8              |
| 765                  | 164.4              | 774                  | 165.5              | 817                  | 168.8              |
| 766                  | 164.4              | 775                  | 165.7              | 818                  | 168.8              |
| 767                  | 164.6              | 776                  | 165.8              | 819                  | 168.8              |
| 768                  | 164.7              | 777                  | 166.0              | 820                  | 168.7              |
| <b>760-768</b>       | <b>164.3</b>       | 778                  | 166.2              | 821                  | 168.7              |
| 782                  | 166.8              | 779                  | 166.4              | 822                  | 168.7              |
| 783                  | 167.0              | 780                  | 166.5              | 823                  | 168.7              |
| 784                  | 167.1              | 781                  | 166.7              | 824                  | 168.6              |
| 785                  | 167.2              | <b>769-781</b>       | <b>165.7</b>       | 825                  | 168.6              |
| 786                  | 167.4              | 790                  | 167.8              | 826                  | 168.5              |
| 787                  | 167.5              | 791                  | 167.9              | 827                  | 168.5              |
| 788                  | 167.6              | 792                  | 168.0              | 828                  | 168.4              |
| 789                  | 167.7              | 793                  | 168.1              | 829                  | 168.4              |
| <b>782-789</b>       | <b>167.3</b>       | 794                  | 168.1              | <b>812-829</b>       | <b>168.7</b>       |
| 806                  | 168.6              | 795                  | 168.2              |                      |                    |
| 807                  | 168.7              | 796                  | 168.3              |                      |                    |
| 808                  | 168.7              | 797                  | 168.3              |                      |                    |
| 809                  | 168.7              | 798                  | 168.4              |                      |                    |
| 810                  | 168.8              | 799                  | 168.4              |                      |                    |
| 811                  | 168.8              | 800                  | 168.4              |                      |                    |
| <b>806-811</b>       | <b>168.7</b>       | 801                  | 168.5              |                      |                    |
| 830                  | 168.3              | 802                  | 168.5              |                      |                    |
| 831                  | 168.3              | 803                  | 168.6              |                      |                    |
| 832                  | 168.2              | 804                  | 168.6              |                      |                    |
| 833                  | 168.2              | 805                  | 168.6              |                      |                    |
| <b>830-833</b>       | <b>168.2</b>       | <b>790-805</b>       | <b>168.3</b>       |                      |                    |

**Note:** the values in bold are average bending angles of the corresponding time ranges.

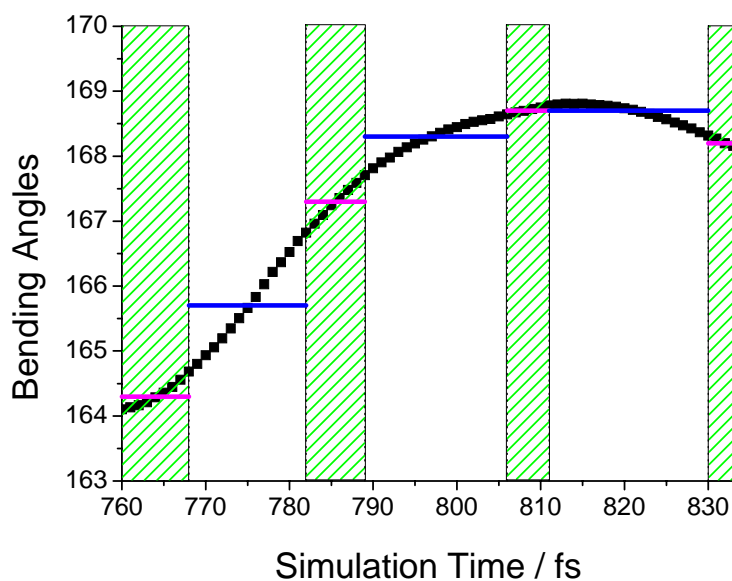

**Figure S5.** The bending angles (degree) of configurations extracted every 1 from the simulation trajectory in the range of 760-833 fs, and the pink and blue bars correspond to the average bending angles (degree) of different time ranges with and without diradical character, respectively. Also, the time ranges with diradical character are marked by sparse green lines.

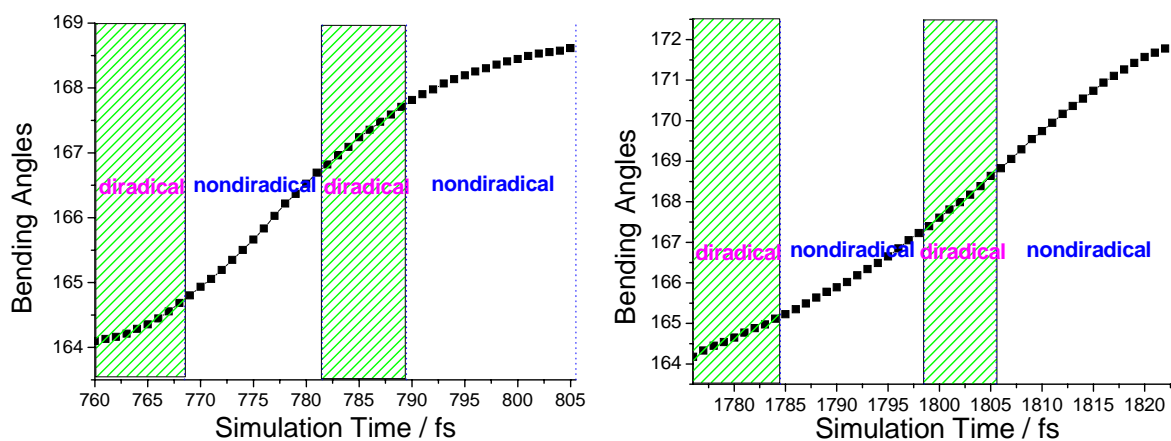

**Figure S6.** The bending angles (degree) of configurations extracted every 1 fs from the simulation trajectory in the range of 760-805 fs (**Left**) and in 1776-1823 fs (**Right**), respectively. The sparse green-line filled areas denote the time ranges in which the diradical character appears.



**Table S8.** Bending Angles ( $^{\circ}$ ) of Configurations Extracted Directly from Different SWCNTs (Single-Point Calculations). (**Note:** Blue Dots Are the Corresponding Centroids of Carbon Atoms in the Corresponding Red Circles, and the Bending Angle Is Referred to the Angle between Three Centroids in One Configuration)

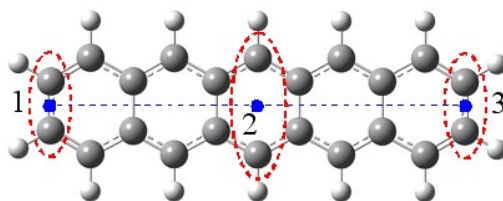

| Bending Angles ( $^{\circ}$ ) | $\langle S^2 \rangle$ | Bending Angles ( $^{\circ}$ ) | $\langle S^2 \rangle$ |
|-------------------------------|-----------------------|-------------------------------|-----------------------|
| 168.1 (SWCNT76)               | 0.35                  | 158.6 (SWCNT42)               | 0.36                  |
| 167.8 (SWCNT74)               | 0.35                  | 157.5 (SWCNT40)               | 0.36                  |
| 167.5 (SWCNT72)               | 0.36                  | 156.3 (SWCNT38)               | 0.36                  |
| 167.1 (SWCNT70)               | 0.35                  | 155.0 (SWCNT36)               | 0.36                  |
| 166.8 (SWCNT68)               | 0.36                  | 153.5 (SWCNT34)               | 0.36                  |
| 166.4 (SWCNT66)               | 0.36                  | 151.9 (SWCNT32)               | 0.37                  |
| 166.0 (SWCNT64)               | 0.36                  | 150.0 (SWCNT30)               | 0.37                  |
| 165.5 (SWCNT62)               | 0.36                  | 147.9 (SWCNT28)               | 0.37                  |
| 165.0 (SWCNT60)               | 0.35                  | 145.4 (SWCNT26)               | 0.38                  |
| 164.5 (SWCNT58)               | 0.36                  | 142.5 (SWCNT24)               | 0.37                  |
| 164.0 (SWCNT56)               | 0.36                  | 139.1 (SWCNT22)               | 0.39                  |
| 163.3 (SWCNT54)               | 0.37                  | 135.0 (SWCNT20)               | 0.39                  |
| 162.7 (SWCNT52)               | 0.36                  | 130.0 (SWCNT18)               | 0.40                  |
| 162.0 (SWCNT50)               | 0.35                  | 123.7 (SWCNT16)               | 0.41                  |
| 161.3 (SWCNT48)               | 0.36                  | 115.7 (SWCNT14)               | 0.43                  |
| 160.4 (SWCNT46)               | 0.36                  | 105.0 (SWCNT12)               | 0.45                  |
| 159.6 (SWCNT44)               | 0.36                  |                               |                       |

**Note:** for each structure with the given bending angle, all other geometrical parameters are not relaxed.

**Table S9.** Bending angles ( $^{\circ}$ ) of the configurations extracted from different SWCNTs with partially optimized parameters (lengths of C1-C29 and C6-C30 are fixed and other geometrical parameters are optimized for each configuration extracted from the corresponding SWCNT). Note that all these partially optimized configurations do not have diradical character.

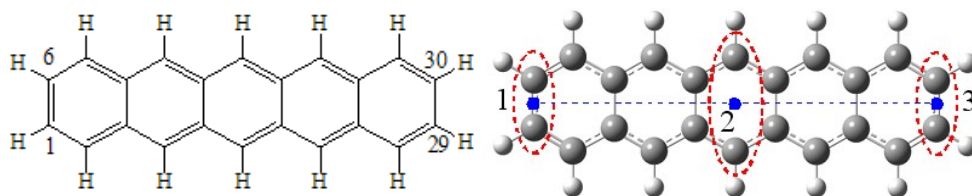

| Pentacene structures extracted from different SWCNTs | Bending angles ( $^{\circ}$ ) | $\langle S^2 \rangle$ |
|------------------------------------------------------|-------------------------------|-----------------------|
| SWCNT76-Pentacene                                    | 168.1                         | 0                     |
| SWCNT64-Pentacene                                    | 166.0                         | 0                     |
| SWCNT56-Pentacene                                    | 164.0                         | 0                     |
| SWCNT50-Pentacene                                    | 162.0                         | 0                     |
| SWCNT44-Pentacene                                    | 159.6                         | 0                     |
| SWCNT22-Pentacene                                    | 139.1                         | 0                     |
| SWCNT18-Pentacene                                    | 130.0                         | 0                     |
| SWCNT16-Pentacene                                    | 123.7                         | 0                     |
| SWCNT14-Pentacene                                    | 115.7                         | 0                     |
| SWCNT12-Pentacene                                    | 105.0                         | 0                     |

## 7. Hydrogen Swing Effect

To clarify if the pure hydrogen swing motion can trigger the diradical character of pentacene molecule, we examine the effect of hydrogen swing on electronic properties. That is, we calculate the BS states of distorted pentacene due to the hydrogen swing by fixing the pentacene C backbone, keeping a plane, and only swinging a part of hydrogen atoms as mentioned in Table S10. In this examination, no in-plane (molecular plane) swing of any hydrogen atoms are considered, and only inward and outward motions (deviating from the

pentacene molecular plane) of a part of hydrogen atoms are considered. All of the distorted configurations considered here are classified as three situations (Table S10). Results indicate that all these distorted configurations do not have diradical character. That is, examinations suggest that no matter hydrogen stretching motion or hydrogen in-plane and out-of-plane swing motions do not trigger potential diradical character. Any motions of hydrogen atoms are not the driving factor of the diradical character appearing of pentacene.

The swing angle is defined as an angle of H-C(linked)-C(para position) in the same benzene ring, that is, the obtuse angle between the H-C bond and the molecular plane.

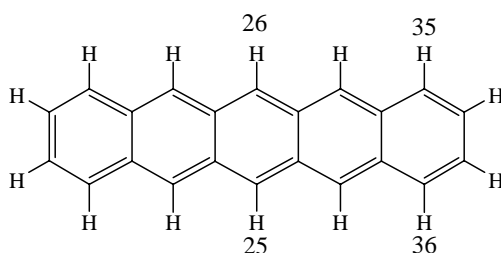

**Table S10.** Swing angles ( $^{\circ}$ ) of the distorted configurations by swinging the marked hydrogen atoms inward and outward and keeping all other atoms (C and H) in a plane (molecular plane)

| <b>Situation 1</b>                                                                        | <b>H35</b> | <b>H36</b> | <b>H26</b> | <b>H25</b> | <b>Other H atoms</b> |
|-------------------------------------------------------------------------------------------|------------|------------|------------|------------|----------------------|
| H35 <sub>inward</sub> H36 <sub>inward</sub>                                               | 175.2      | 175.2      | 180.0      | 180.0      | 180.0                |
| H35 <sub>inward</sub> H36 <sub>inward</sub>                                               | 175.7      | 173.9      | 180.0      | 180.0      | 180.0                |
| H35 <sub>inward</sub> H36 <sub>inward</sub>                                               | 176.3      | 171.4      | 180.0      | 180.0      | 180.0                |
| H35 <sub>inward</sub> H36 <sub>inward</sub>                                               | 172.5      | 178.4      | 180.0      | 180.0      | 180.0                |
| H35 <sub>outward</sub> H36 <sub>inward</sub>                                              | 175.2      | 175.2      | 180.0      | 180.0      | 180.0                |
| H35 <sub>outward</sub> H36 <sub>inward</sub>                                              | 175.7      | 173.9      | 180.0      | 180.0      | 180.0                |
| H35 <sub>outward</sub> H36 <sub>inward</sub>                                              | 176.3      | 171.4      | 180.0      | 180.0      | 180.0                |
| H35 <sub>outward</sub> H36 <sub>inward</sub>                                              | 172.5      | 178.4      | 180.0      | 180.0      | 180.0                |
| <b>Situation 2</b>                                                                        | <b>H35</b> | <b>H36</b> | <b>H26</b> | <b>H25</b> | <b>Other H atoms</b> |
| H26 <sub>inward</sub> H25 <sub>inward</sub>                                               | 180.0      | 180.0      | 175.2      | 175.2      | 180.0                |
| H26 <sub>inward</sub> H25 <sub>inward</sub>                                               | 180.0      | 180.0      | 175.7      | 173.9      | 180.0                |
| H26 <sub>inward</sub> H25 <sub>inward</sub>                                               | 180.0      | 180.0      | 176.3      | 171.4      | 180.0                |
| H26 <sub>inward</sub> H25 <sub>inward</sub>                                               | 180.0      | 180.0      | 172.5      | 178.4      | 180.0                |
| H26 <sub>outward</sub> H25 <sub>inward</sub>                                              | 180.0      | 180.0      | 175.2      | 175.2      | 180.0                |
| H26 <sub>outward</sub> H25 <sub>inward</sub>                                              | 180.0      | 180.0      | 175.7      | 173.9      | 180.0                |
| H26 <sub>outward</sub> H25 <sub>inward</sub>                                              | 180.0      | 180.0      | 176.3      | 171.4      | 180.0                |
| H26 <sub>outward</sub> H25 <sub>inward</sub>                                              | 180.0      | 180.0      | 172.5      | 178.4      | 180.0                |
| <b>Situation 3</b>                                                                        | <b>H35</b> | <b>H36</b> | <b>H26</b> | <b>H25</b> | <b>Other H atoms</b> |
| H26 <sub>outward</sub> H25 <sub>inward</sub> H35 <sub>inward</sub> H36 <sub>outward</sub> | 175.2      | 175.2      | 175.2      | 175.2      | 180.0                |

|                                                                                           |       |       |       |       |       |
|-------------------------------------------------------------------------------------------|-------|-------|-------|-------|-------|
| H26 <sub>inward</sub> H25 <sub>inward</sub> H35 <sub>inward</sub> H36 <sub>inward</sub>   | 176.2 | 171.4 | 172.6 | 178.4 | 180.0 |
| H26 <sub>outward</sub> H25 <sub>inward</sub> H35 <sub>outward</sub> H36 <sub>inward</sub> | 176.2 | 171.4 | 178.4 | 172.6 | 180.0 |
| H26 <sub>inward</sub> H25 <sub>inward</sub> H35 <sub>outward</sub> H36 <sub>outward</sub> | 171.4 | 176.2 | 172.6 | 178.4 | 180.0 |
| H26 <sub>outward</sub> H25 <sub>outward</sub> H35 <sub>inward</sub> H36 <sub>inward</sub> | 171.4 | 176.2 | 178.4 | 172.6 | 180.0 |
| H26 <sub>inward</sub> H25 <sub>inward</sub> H35 <sub>inward</sub> H36 <sub>outward</sub>  | 170.0 | 170.0 | 170.0 | 170.0 | 180.0 |
| H26 <sub>inward</sub> H25 <sub>outward</sub> H35 <sub>inward</sub> H36 <sub>inward</sub>  | 165.0 | 165.0 | 165.0 | 165.0 | 180.0 |

**Note:** the bending angle refers to the obtuse angle deviated (inward and outward) from the molecular plane for the marked atoms, e. g.  $\angle HC_1C_2$  where the  $C_1$  is the H-linked C, and the  $C_2$  is the para-position C of  $C_1$  in the same six-membered ring.

## 8. Singly Occupied Molecular Orbitals and Spin Density Distributions of Some Snapshot Configurations with Diradical Character Extracted from the AIMD Simulation Trajectory

**Table S11.** Singly occupied molecular orbitals (SOMO, isovalue=0.04) and spin density distributions (isovalue=0.004) of the open-shell broken-symmetry (BS) singlet state for various instantaneous diradical configurations extracted from the AIMD simulation trajectory. **Note** that the isovalue values of spin density maps of the BS states for configurations at 1716 and 1824 fs are 0.0004

| Time (fs) | SOMO ( $\alpha$ )                                                                   | SOMO ( $\beta$ )                                                                    | Spin density distribution                                                             |
|-----------|-------------------------------------------------------------------------------------|-------------------------------------------------------------------------------------|---------------------------------------------------------------------------------------|
| 648       | 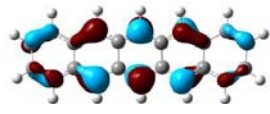 |  |  |
| 649       |  |  |  |
| 650       |  |  |  |
| 651       |  |  |  |
| 652       |  |  |  |

|                  |                                                                                     |                                                                                      |                                                                                       |
|------------------|-------------------------------------------------------------------------------------|--------------------------------------------------------------------------------------|---------------------------------------------------------------------------------------|
| 653              | 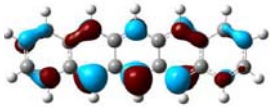   |    |    |
| 654              |    |    |    |
| 655              |    |    |    |
| 656              |    |    |    |
| 657              |    |    |    |
| 657-672 CS state |                                                                                     |                                                                                      |                                                                                       |
| 673              |   |   |   |
| 674              |  |  |  |
| 675              |  |  |  |
| 676              |  |  |  |
| 677              |  |  |  |
| 678              |  |  |  |
| 679-695 CS state |                                                                                     |                                                                                      |                                                                                       |
| 696              |  |  |  |
| 697              |  |  |  |



|                  |                                                                                     |                                                                                     |                                                                                       |
|------------------|-------------------------------------------------------------------------------------|-------------------------------------------------------------------------------------|---------------------------------------------------------------------------------------|
| 698              |    |    |    |
| 699              |    |    |    |
| 700              |    |    |    |
| 701              |    |    |    |
| 702-718 CS state |                                                                                     |                                                                                     |                                                                                       |
| 719              |    |    |    |
| 720              |   |   |   |
| 721              |  |  |  |
| 722              |  |  |  |
| 723              |  |  |  |
| 724              |  |  |  |
| 725-739 CS state |                                                                                     |                                                                                     |                                                                                       |
| 740              |  |  |  |
| 741              |  |  |  |
| 742              |  |  |  |

|                  |                                                                                     |                                                                                     |                                                                                       |
|------------------|-------------------------------------------------------------------------------------|-------------------------------------------------------------------------------------|---------------------------------------------------------------------------------------|
| 743              | 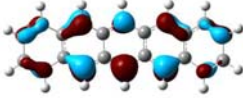   |    |    |
| 744              |    |    |    |
| 745              |    |    |    |
| 744-759 CS state |                                                                                     |                                                                                     |                                                                                       |
| 760              |    |    |    |
| 761              |    |    |    |
| 762              |   |   |   |
| 763              |  |  |  |
| 764              |  |  |  |
| 765              |  |  |  |
| 766              |  |  |  |
| 767              |  |  |  |
| 768              |  |  |  |
| 769-781 CS state |                                                                                     |                                                                                     |                                                                                       |
| 782              |  |  |  |



|                  |                                                                                     |                                                                                     |                                                                                       |
|------------------|-------------------------------------------------------------------------------------|-------------------------------------------------------------------------------------|---------------------------------------------------------------------------------------|
| 783              | 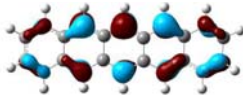   |    |    |
| 784              |    |    |    |
| 785              |    |    |    |
| 786              |    |    |    |
| 787              |    |    |    |
| 788              |    |    |    |
| 789              |   |   |   |
| 788-805 CS state |                                                                                     |                                                                                     |                                                                                       |
| 806              |  |  |  |
| 807              |  |  |  |
| 808              |  |  |  |
| 809              |  |  |  |
| 810              |  |  |  |
| 811              |  |  |  |
| 812-829 CS state |                                                                                     |                                                                                     |                                                                                       |



|                    |                                                                                     |                                                                                     |                                                                                       |
|--------------------|-------------------------------------------------------------------------------------|-------------------------------------------------------------------------------------|---------------------------------------------------------------------------------------|
| 830                | 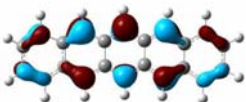   |    |    |
| 831                |    |    |    |
| 832                |    |    |    |
| 833                |    |    |    |
| 1717-1776 CS state |                                                                                     |                                                                                     |                                                                                       |
| 1716               |    |    |    |
| 1776               |   |   |   |
| 1777               |  |  |  |
| 1778               |  |  |  |
| 1779               |  |  |  |
| 1780               |  |  |  |
| 1781               |  |  |  |
| 1782               |  |  |  |
| 1783               |  |  |  |

|                    |  |  |  |
|--------------------|--|--|--|
| 1784               |  |  |  |
| 1785-1798 CS state |  |  |  |
| 1799               |  |  |  |
| 1800               |  |  |  |
| 1801               |  |  |  |
| 1802               |  |  |  |
| 1803               |  |  |  |
| 1804               |  |  |  |
| 1805               |  |  |  |
| 1806-1823 CS state |  |  |  |
| 1824               |  |  |  |
| 1825               |  |  |  |
| 1826               |  |  |  |
| 1827               |  |  |  |
| 1828               |  |  |  |

|                    |                                                                                     |                                                                                     |                                                                                       |
|--------------------|-------------------------------------------------------------------------------------|-------------------------------------------------------------------------------------|---------------------------------------------------------------------------------------|
| 1829               | 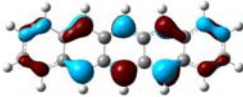   |    |    |
| 1830-1788 CS state |                                                                                     |                                                                                     |                                                                                       |
| 1889               |    |    |    |
| 1890               |    |    |    |
| 1891               |    |    |    |
| 1892               |    |    |    |
| 1893               |   |   |   |
| 1894               |  |  |  |
| 1895               |  |  |  |

## 9. Vibration-Caused Distorted Configurations and Their Diradical Character

**Table S12.** 26 vibrational modes (the numbers in parentheses are referred to the numberings in the original 102 vibrational modes) which lead to diradical character of pentacene and the corresponding IR frequencies (Freq/cm<sup>-1</sup>), geometrical characters, HOMO-LUMO gaps (H-L gap, eV) of the closed-shell singlet states, T-S gaps between the closed-shell singlet and triplet states (E(triplet)-E(singlet), kcal/mol), T-BS gaps between the broken-symmetry (BS) singlet and triplet states (E(triplet)-E(BS), kcal/mol), and  $\langle S^2 \rangle$  values, SOMO ( $\alpha, \beta$ ), spin densities of the BS states of the mode-distorted pentacene configurations. Note that the distorted configuration denotes its largest distortion for each vibrational mode.



| Modes<br>Freq     | H-L gap<br>T-S gap<br>T-BS gap<br>$\langle S^2 \rangle$ | Vibration-Induced Distortion<br>Character (upper)<br>BS State Spin Densities (lower)                                                                                       | BS State<br>SOMO ( $\alpha$ , upper)<br>SOMO ( $\beta$ , lower)                                                                                                              |
|-------------------|---------------------------------------------------------|----------------------------------------------------------------------------------------------------------------------------------------------------------------------------|------------------------------------------------------------------------------------------------------------------------------------------------------------------------------|
| 1. (9)<br>263.25  | 2.008<br>17.81<br>17.83<br>0.0889                       | 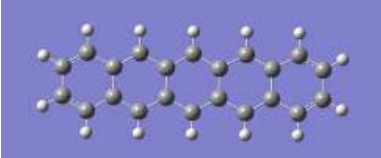<br>     | <br>     |
| 2. (19)<br>490.10 | 2.128<br>19.67<br>19.67<br>0.0002                       | <br>    | <br>    |
| 3.(24)<br>614.76  | 1.933<br>10.98<br>12.20<br>0.5052                       | <br> | <br> |
| 4.(25)<br>637.37  | 1.919<br>9.85<br>12.10<br>0.7054                        | <br> | <br> |

|                                 |                                                    |                                                                                                                                                                            |                                                                                                                                                                              |
|---------------------------------|----------------------------------------------------|----------------------------------------------------------------------------------------------------------------------------------------------------------------------------|------------------------------------------------------------------------------------------------------------------------------------------------------------------------------|
| <p><b>5.(26)</b><br/>644.89</p> | <p>1.735<br/>-1.99<br/>5.86<br/><b>0.8535</b></p>  | <br>     | <br>     |
| <p><b>6.(29)</b><br/>745.99</p> | <p>1.950<br/>13.55<br/>14.08<br/><b>0.3585</b></p> | <br>    | <br>    |
| <p><b>7.(33)</b><br/>762.86</p> | <p>1.700<br/>10.11<br/>11.24<br/><b>0.5469</b></p> | <br> | <br> |
| <p><b>8.(36)</b><br/>796.76</p> | <p>1.707<br/>6.36<br/>8.37<br/><b>0.6200</b></p>   | <br> | <br> |

|                                   |                                                    |                                                                                                                                                                            |                                                                                                                                                                              |
|-----------------------------------|----------------------------------------------------|----------------------------------------------------------------------------------------------------------------------------------------------------------------------------|------------------------------------------------------------------------------------------------------------------------------------------------------------------------------|
| <p><b>9.(37)</b><br/>835.17</p>   | <p>2.090<br/>18.03<br/>18.04<br/><b>0.0622</b></p> | <br>     | <br>     |
| <p><b>10.(42)</b><br/>891.14</p>  | <p>2.123<br/>17.14<br/>17.16<br/><b>0.0675</b></p> | <br>     | <br>     |
| <p><b>11.(47)</b><br/>930.20</p>  | <p>2.056<br/>18.42<br/>18.42<br/><b>0.0165</b></p> | <br> | <br> |
| <p><b>12.(53)</b><br/>1020.13</p> | <p>1.715<br/>8.48<br/>10.20<br/><b>0.6109</b></p>  | <br> | <br> |
| <p><b>13.(64)</b><br/>1256.43</p> | <p>2.092<br/>16.90<br/>16.93<br/><b>0.0910</b></p> |                                                                                         |                                                                                          |



|                           |                                          |                                                                                                                                                                            |                                                                                                                                                                              |
|---------------------------|------------------------------------------|----------------------------------------------------------------------------------------------------------------------------------------------------------------------------|------------------------------------------------------------------------------------------------------------------------------------------------------------------------------|
|                           |                                          | 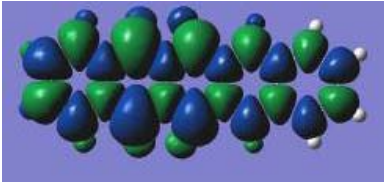                                                                                          |                                                                                            |
| <b>14.(69)</b><br>1337.79 | 1.929<br>15.24<br>15.75<br><b>0.3884</b> | <br>     | <br>     |
| <b>15.(72)</b><br>1420.93 | 0.746<br>-28.22<br>1.84<br><b>1.2254</b> | <br>    | <br>    |
| <b>16.(75)</b><br>1435.85 | 2.089<br>15.35<br>15.59<br><b>0.2437</b> | <br> | <br> |
| <b>17.(76)</b><br>1442.37 | 0.933<br>-13.06<br>2.35<br><b>1.1125</b> | <br> | <br> |

|                                   |                                                    |                                                                                                                                                                            |                                                                                                                                                                              |
|-----------------------------------|----------------------------------------------------|----------------------------------------------------------------------------------------------------------------------------------------------------------------------------|------------------------------------------------------------------------------------------------------------------------------------------------------------------------------|
| <p><b>18.(78)</b><br/>1482.12</p> | <p>2.051<br/>17.99<br/>18.01<br/><b>0.0640</b></p> | 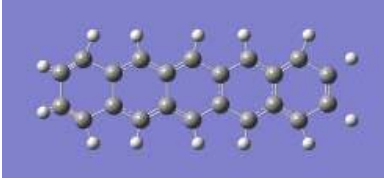<br>     | <br>     |
| <p><b>19.(79)</b><br/>1498.04</p> | <p>1.210<br/>-0.10<br/>7.23<br/><b>1.1300</b></p>  | <br>    | <br>    |
| <p><b>20.(80)</b><br/>1547.84</p> | <p>1.503<br/>-2.42<br/>4.15<br/><b>0.8794</b></p>  | <br> | <br> |
| <p><b>21.(81)</b><br/>1563.91</p> | <p>2.652<br/>14.99<br/>17.03<br/><b>0.4631</b></p> | <br> | <br> |



|                                   |                                                    |                                                                                                                                                                            |                                                                                                                                                                              |
|-----------------------------------|----------------------------------------------------|----------------------------------------------------------------------------------------------------------------------------------------------------------------------------|------------------------------------------------------------------------------------------------------------------------------------------------------------------------------|
| <p><b>22.(85)</b><br/>1640.76</p> | <p>0.573<br/>-16.53<br/>0.32<br/><b>1.0523</b></p> | 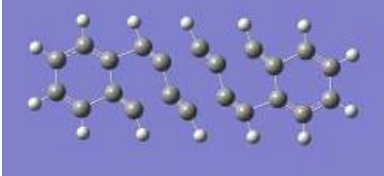<br>     | <br>     |
| <p><b>23.(86)</b><br/>1645.43</p> | <p>1.880<br/>9.02<br/>11.09<br/><b>0.6501</b></p>  | <br>    | <br>    |
| <p><b>25.(87)</b><br/>1676.71</p> | <p>1.701<br/>9.12<br/>13.59<br/><b>1.0236</b></p>  | <br> | <br> |
| <p><b>26.(88)</b><br/>1678.56</p> | <p>1.368<br/>-5.35<br/>7.19<br/><b>1.4610</b></p>  | <br> | <br> |
